# Supplementary material
Source: publisher site journal article supplement (https://www.spandidos-publications.com/8615/downloadSupplementary)
Supplement: Supplementary file 1 [file downloadSupplementary]

Table SI. Specific primers for reverse transcription-quantitative PCR.

| Target name | Direction | Primers (5'-3')         |
|-------------|-----------|-------------------------|
| GAPDH       | F         | GGAGCGAGATCCCTCCAAAAT   |
|             | R         | GGCTGTTGTCATACTTCTCATGG |
| Akt         | F         | CGAGCTGTTCTTCCACCTGT    |
|             | R         | GTCCTTGATCCCCTCCTTGC    |
| mTOR        | F         | CTTATGGTGCGGTCCCTTGT    |
|             | R         | AGGATGGTCAAGTTGCCGAG    |
| Mcl-1       | F         | TTGGCCTCAAAGAAACGCG     |
|             | R         | GTCCAGTTTCCGAAGCATGC    |
| Bim         | F         | GCAGATATGCGCCCAGAGAT    |
|             | R         | TGTCTGCATGGTATCTCGGC    |
| Bcl-2       | F         | CCGCATCAGGAAGGCTAGAG    |
|             | R         | CCACACTGCCCTGTTGATCA    |
| Bcl-xL      | F         | TCCCCATGGCAGCAGTAAAG    |
|             | R         | CGACCCCAGTTTACCCCATC    |
| Bak         | F         | CCCTAAGCATGTGTCCCAGG    |
|             | R         | CTTGGAGGCTTCTGACACGT    |
| Bax         | F         | CCAAGAAGCTGAGCGAGTGT    |
|             | R         | CTGATCAGTTCCGGCACCTT    |

F, forward; R, reverse; Mcl-1, myeloid cell leukemia-1; Bim, Bcl-2 interacting mediator of cell death; Bcl-xL, B-cell lymphoma-extra large; Bak, Bcl-2 antagonist killer 1; Bax, Bcl-2 associated X.
